# Supplementary material for: Glucuronidation Metabolomic Fingerprinting to Map Host-Microbe Metabolism
Source: Research Square preprint supplement (doi:10.21203/rs.3.rs-6321321/v1), 2025-04-08
Supplement: Supplementary file 1 [file b41aab6c05cbb152b2b6b7e4.xlsx]

## Sheet: Information
Supplementary Tables: Methods
Table_M1:	Glucuronidated Standards
Table_M2:	Orbitrap Parameters
Table_M3:	ZenoTOF Parameters

## Sheet: Table_M1
Reagent/Chemical Name	Catalogue Number	Supplier/Manufacturer	Supplier/Manufacturer Location
(S)-6-Gingerol-4'-O-Beta-glucuronide Sodium Salt	TRC-G387210-1MG	LGC Standards	Manchester, NH
(S)-Naproxen Acyl-Beta-D-glucuronide	TRC-N377530-1MG	LGC Standards	Manchester, NH
11Alpha-Hydroxy Progesterone Beta-D-Glucuronide	TRC-H952345-1MG	LGC Standards	Manchester, NH
16a-Hydroxyestrone 16-b-D-Glucuronide Sodium Salt	TRC-H941906-0.5MG	LGC Standards	Manchester, NH
18alpha-Glycyrrhetinic Acid 3-O-beta-D-Glucuronide	TRC-G735155-10MG	LGC Standards	Manchester, NH
1-Hydroxypyrene beta-D-Glucuronide	TRC-H952750-1MG	LGC Standards	Manchester, NH
1-Naphthol Beta-D-Glucuronide Sodium Salt	TRC-N368000-1MG	LGC Standards	Manchester, NH
1-Salicylate Glucuronide	34820	Cayman Chemical	Ann Arbor, MI
25-Hydroxyvitamin D3 3-Glucuronide >90%	TRC-H995880-0.5MG	LGC Standards	Manchester, NH
2-Aminophenyl Beta-D-Glucuronide	TRC-A623995-50MG	LGC Standards	Manchester, NH
3,3',5'-Triiodo-L-thyronine O-Beta-D-Glucuronide	TRC-T795425-1MG	LGC Standards	Manchester, NH
3,4-Dihydroxybenzoic Acid 3-O-beta-D-Glucuronide	TRC-D451685-5MG	LGC Standards	Manchester, NH
3,5-Dihydroxybenzoic Acid 3-O-Beta-D-Glucuronide	TRC-D451705-5MG	LGC Standards	Manchester, NH
3,5-Dihydroxyphenylpropanoic Acid 3-O-Beta-D-Glucuronide	TRC-D454370-2.5MG	LGC Standards	Manchester, NH
3’-Hydroxytyrosol 3’-Glucuronide	TRC-H977030-1MG	LGC Standards	Manchester, NH
3’-Hydroxytyrosol 4’-Glucuronide Sodium Salt	TRC-H977025-1MG	LGC Standards	Manchester, NH
4’-O-Benzyl Bisphenol A Beta-D-Glucuronide	TRC-B233050-1MG	LGC Standards	Manchester, NH
4-Hydroxyestradiol 4-O-Beta-D-Glucuronide Sodium Salt	TRC-H941610-1MG	LGC Standards	Manchester, NH
4-Hydroxyindole O-b-D-Glucuronide Sodium Salt	TRC-H943443-2.5MG	LGC Standards	Manchester, NH
4-tert-Octylphenol-glucuronide	TRC-O293845-100MG	LGC Standards	Manchester, NH
5-Hydroxy Tryptophol beta-D-Glucuronide Sodium Salt	TRC-H976010-0.5MG	LGC Standards	Manchester, NH
7-hydroxy Coumarin Glucuronide (sodium salt)	19882	Cayman Chemical	Ann Arbor, MI
7-Hydroxy-4-Methyl Coumarin Glucuronide Cyclohexanamine Salt	TRC-H924805-1MG	LGC Standards	Manchester, NH
Acetylsalicylic Acid Acyl-Beta-D-glucuronide	TRC-A187775-1MG	LGC Standards	Manchester, NH
Apigenin 4'-O-b-D-Glucuronide Sodium Salt (~90%)	TRC-A726513	LGC Standards	Manchester, NH
Apigenin 7-O-Glucuronide (hydrate)	33754	Cayman Chemical	Ann Arbor, MI
Baicalin	19843	Cayman Chemical	Ann Arbor, MI
Benzoic Acid Acyl-b-D-glucuronide	TRC-B203930-10MG	LGC Standards	Manchester, NH
Beta-Muricholic Acid Glucuronide Conjugate 4	TRC-M234673-1MG	LGC Standards	Manchester, NH
Bisphenol A beta-D-Glucuronide	TRC-B519510-1MG	LGC Standards	Manchester, NH
Bisphenol A Bis-(b-D-glucuronide) Sodium Salt	TRC-B519520	LGC Standards	Manchester, NH
Bisphenol B Mono-Beta-D-glucuronide	TRC-B519463-2.5MG	LGC Standards	Manchester, NH
Bisphenol F Mono-Beta-D-glucuronide	TRC-B519598-2.5MG	LGC Standards	Manchester, NH
Bisphenol S Bis-b-d-Glucuronide	TRC-B964955-5MG	LGC Standards	Manchester, NH
Caffeic Acid 3-beta-D-Glucuronide	TRC-C080015-1MG	LGC Standards	Manchester, NH
Caffeic Acid 4-beta-D-Glucuronide	TRC-C080020-2.5MG	LGC Standards	Manchester, NH
Chenodeoxycholic Acid 24-Acyl-β-D-Glucuronide	33227	Cayman Chemical	Ann Arbor, MI
Cholic Acid 3-O-Beta-Glucuronide Disodium Salt	TRC-C432625-1MG	LGC Standards	Manchester, NH
Cholic Acid Acyl Glucuronide	TRC-A305350-5MG	LGC Standards	Manchester, NH
Chrysin 7-Glucuronide	35034	Cayman Chemical	Ann Arbor, MI
cis Resveratrol 4’-O-Beta-D-Glucuronide	TRC-R150020-1MG	LGC Standards	Manchester, NH
cis-Resveratrol 3-O-Beta-D-Glucuronide (contains up to 15% trans isomer)	TRC-R150010-1MG	LGC Standards	Manchester, NH
Cortisol 21-Beta-D-Glucuronide Sodium Salt(>90%)	TRC-C696315-1MG	LGC Standards	Manchester, NH
Cotinine N-alpha-D-Glucuronide	TRC-C725170-1MG	LGC Standards	Manchester, NH
Cotinine N-beta-D-Glucuronide	TRC-C725175-1MG	LGC Standards	Manchester, NH
Curcumin Beta-D-Glucuronide Sodium Salt	TRC-C838505-1MG	LGC Standards	Manchester, NH
Daidzein 4’-Beta-D-Glucuronide	TRC-D103490-2.5MG	LGC Standards	Manchester, NH
Daidzein 7-Beta-D-Glucuronide 4’-Sulfate Disodium Salt	TRC-D103525-1MG	LGC Standards	Manchester, NH
Daidzein 7-beta-D-Glucuronide Potassium Salt	TRC-D103510-5MG	LGC Standards	Manchester, NH
Daidzein-7-sulfate-4’-Beta-D-glucuronide Disodium Salt	TRC-D103565-1MG	LGC Standards	Manchester, NH
Deoxycholic Acid 3-O-Beta-D-Glucuronide Disodium Salt	TRC-D232720-1MG	LGC Standards	Manchester, NH
Desacetyl Bisacodyl b-D-Glucuronide	TRC-D288650	LGC Standards	Manchester, NH
D-Glucuronic Acid	31531	Cayman Chemical	Ann Arbor, MI
Dihydro Caffeic Acid 3-O-Beta-D-Glucuronide Diammonium Salt	TRC-D448245-2.5MG	LGC Standards	Manchester, NH
Dihydro Ferulic Acid 4-O-beta-D-Glucuronide	TRC-D448315-2.5MG	LGC Standards	Manchester, NH
Dihydro Isoferulic Acid 3-O-beta-D-Glucuronide	TRC-D448940-2.5MG	LGC Standards	Manchester, NH
Diosmetin 3-O-Beta-D-Glucuronide	TRC-D485015-1MG	LGC Standards	Manchester, NH
Diosmetin 7-O-Beta-D-Glucuronide Sodium Salt	TRC-D485010-5MG	LGC Standards	Manchester, NH
Diphenhydramine N-Beta-D-Glucuronide	TRC-D486910-2.5MG	LGC Standards	Manchester, NH
Dopamine 3-Beta-D-Glucuronide Sodium Salt	TRC-D533790-1MG	LGC Standards	Manchester, NH
Dopamine 4-Beta-D-Glucuronide	TRC-D533795-1MG	LGC Standards	Manchester, NH
Estradiol 17-(β-D-Glucuronide) (sodium salt hydrate)	16156	Cayman Chemical	Ann Arbor, MI
Estradiol 3-(β-D-Glucuronide) (sodium salt)	16155	Cayman Chemical	Ann Arbor, MI
Estriol 16α-(β-D-Glucuronide)	39140	Cayman Chemical	Ann Arbor, MI
Estrone-3-Glucuronide (sodium salt hydrate)	34417	Cayman Chemical	Ann Arbor, MI
ethyl β-D-glucuronide	0901-10	Athena Enzyme Systems	Baltimore, MD
Etonogestrel beta-D-Glucuronide	TRC-E933630-2.5MG	LGC Standards	Manchester, NH
Ferulic Acid 4-O-beta-D-Glucuronide Disodium Salt	TRC-F308910-5MG	LGC Standards	Manchester, NH
Formononetin 7-O-Beta-D-Glucuronide	TRC-F693210-10MG	LGC Standards	Manchester, NH
Genistein 4’-Beta-D-Glucuronide	TRC-G349990-2.5MG	LGC Standards	Manchester, NH
Genistein 7-Beta-D-Glucuronide	TRC-G350015-2.5MG	LGC Standards	Manchester, NH
Genistein 7-Beta-D-Glucuronide 4’-Sulfate Disodium Salt	TRC-G349980-1MG	LGC Standards	Manchester, NH
Genistein-7-sulfate 4’-b-D-glucuronide Disodium Salt	TRC-G350050-0.5MG	LGC Standards	Manchester, NH
Glycochenodeoxycholic Acid-3-O-Beta-glucuronide Disodium Salt	TRC-G641275-0.5MG	LGC Standards	Manchester, NH
Glycodeoxycholic Acid-3-O-Beta-glucuronide Disodium Salt	TRC-G641405-1MG	LGC Standards	Manchester, NH
Glycohyodeoxycholic Acid 3-O-Beta-Glucuronide Disodium Salt	TRC-G641393-1MG	LGC Standards	Manchester, NH
Glycyrrhetic Acid 3-O-Beta-D-Glucuronide	TRC-G735010-5MG	LGC Standards	Manchester, NH
Gypsogenin-3-O-glucuronide	TRC-G931813-10MG	LGC Standards	Manchester, NH
Hesperetin 3’-O-Beta-D-Glucuronide	TRC-H289505-0.5MG	LGC Standards	Manchester, NH
Hibifolin CRS	EPY0002130	LGC Standards	Manchester, NH
Ibuprofen Acyl-Beta-D-glucuronide (mixture of diastereomers)	TRC-I140030-1MG	LGC Standards	Manchester, NH
indoxyl β-D-glucuronide cyclohexylammonium salt	I7638	Sigma-Aldrich	St. Loius, MO
Isoferulic Acid 3-O-beta-D-Glucuronide	TRC-I816150-5MG	LGC Standards	Manchester, NH
Isosteviol Acyl-Beta-D-glucuronide Potassium Salt	TRC-I902218-1MG	LGC Standards	Manchester, NH
Isourolithin A 9-Glucuronide Sodium Salt	TRC-I917530-1MG	LGC Standards	Manchester, NH
Kaempferol 3-glucuronide	34645	Cayman Chemical	Ann Arbor, MI
Lithocholic Acid 24-Ac-O-beta-D-Glucuronide	TRC-L469195-0.5MG	LGC Standards	Manchester, NH
Lithocholic Acid 3-O-Glucuronide	TRC-L469190-1MG	LGC Standards	Manchester, NH
Luteolin 7-O-Glucuronide	33188	Cayman Chemical	Ann Arbor, MI
Mono-2-ethylhexyl Phthalate Glucuronide	TRC-M542500-5MG	LGC Standards	Manchester, NH
Monobenzyl Phthalate Beta-D-Glucuronide	TRC-M524910-5MG	LGC Standards	Manchester, NH
Monobutyl Phthalate Acyl-Beta-D-glucuronide	TRC-M525105-5MG	LGC Standards	Manchester, NH
Monomethyl Phthalate O-Beta-D-Glucuronide	TRC-M566545-5MG	LGC Standards	Manchester, NH
Monooctyl Phthalate Beta-D-Glucuronide	TRC-M566655-5MG	LGC Standards	Manchester, NH
Monopropyl Phthalate O-Beta-D-Glucuronide	TRC-M567105-5MG	LGC Standards	Manchester, NH
N-Acetyl Serotonin Beta-D-Glucuronide	TRC-A187790-1MG	LGC Standards	Manchester, NH
Naringenin 4'-O-Beta-D-Glucuronide Sodium Salt(Mixture of Diastereomers)	TRC-N379010-1MG	LGC Standards	Manchester, NH
Naringenin-7-O-β-D-Glucuronide	10388	Cayman Chemical	Ann Arbor, MI
Nicotine N-beta-D-Glucuronide	TRC-N424575-1MG	LGC Standards	Manchester, NH
Nicotinic Acid Acyl-Beta-D-glucuronide	TRC-N429260-1MG	LGC Standards	Manchester, NH
Norethindrone Beta-D-Glucuronide	TRC-N676005-1MG	LGC Standards	Manchester, NH
o-Cresol Beta-D-Glucuronide	TRC-C782000-5MG	LGC Standards	Manchester, NH
o-Phenylphenol Glucuronide	TRC-P336125-10MG	LGC Standards	Manchester, NH
p-Acetamidophenyl β-D-glucuronide Sodium Salt (Acetaminophen Glucuronide)	A4438	Sigma-Aldrich	St. Loius, MO
p-Coumaric Acid 4-O-Beta-D-Glucuronide	TRC-C755370-10MG	LGC Standards	Manchester, NH
p-Cresol Glucuronide	35113	Cayman Chemical	Ann Arbor, MI
Phenyl b-D-Glucuronide	TRC-P326500-25MG	LGC Standards	Manchester, NH
Pregnanediol-3-Glucuronide	26714	Cayman Chemical	Ann Arbor, MI
Pregnanolone 3-b-D-Glucuronide	TRC-P711310-1MG	LGC Standards	Manchester, NH
Propyl Beta-D-Glucuronide	TRC-P835275-5MG	LGC Standards	Manchester, NH
Propylene Glycol 1-Glucuronide Sodium Salt (Mixture of Diastereomers)	TRC-P835235-2.5MG	LGC Standards	Manchester, NH
p-Salicylic Acid 4-Glucuronide Potassium Salt	TRC-S088140-5MG	LGC Standards	Manchester, NH
Quercetin 3-O-glucuronide	21289	Cayman Chemical	Ann Arbor, MI
Quercetin 7-O-Beta-D-Glucuronide	TRC-Q509515-2.5MG	LGC Standards	Manchester, NH
rac-Hesperetin 3’-O-Beta-D-Glucuronide (Mixture of Diastereomers)	TRC-H289506-5MG	LGC Standards	Manchester, NH
rac-Hesperetin 7-O-Beta-D-Glucuronide	TRC-H288995-5MG	LGC Standards	Manchester, NH
Salicylic Acid Acyl-b-D-glucuronide	TRC-S088135	LGC Standards	Manchester, NH
Scutellarin	27461	Cayman Chemical	Ann Arbor, MI
Serotonin Beta-D-Glucuronide	TRC-S274990-5MG	LGC Standards	Manchester, NH
Steviol Acyl Glucuronide Potassium Salt	TRC-S686728-1MG	LGC Standards	Manchester, NH
Tetrahydro 11-Deoxycorticosterone 3Alpha-Beta-D-Glucuronide	TRC-T293275-1MG	LGC Standards	Manchester, NH
Thymol O-(beta)-D-Glucuronide	TRC-T413050-10MG	LGC Standards	Manchester, NH
Thyroxine 4’-O-beta-D-Glucuronide	TRC-T425630-1MG	LGC Standards	Manchester, NH
trans-3'-Hydroxy Cotinine N-Beta-D-Glucuronide	TRC-H924530-1MG	LGC Standards	Manchester, NH
trans-3'-Hydroxy Cotinine O-beta-D-Glucuronide Sodium Salt	TRC-H414340-1MG	LGC Standards	Manchester, NH
trans-Resveratrol-3-O-β-D-Glucuronide	13832	Cayman Chemical	Ann Arbor, MI
trans-Resveratrol-4'-O-D-Glucuronide	13833	Cayman Chemical	Ann Arbor, MI
Triclosan O-Beta-D-Glucuronide Sodium Salt	TRC-T774260-1MG	LGC Standards	Manchester, NH
Tyrosol Glucuronide	TRC-T947810	LGC Standards	Manchester, NH
Ursodeoxycholic Acid Acyl-Beta-D-glucuronide, ~85%	TRC-U850010-1MG	LGC Standards	Manchester, NH
Ursodeoxycholic Acid-3-O-Beta-D-glucuronide Disodium Salt	TRC-U850015-1MG	LGC Standards	Manchester, NH
Wogonoside	29332	Cayman Chemical	Ann Arbor, MI
R,S Equol 7- beta-D-Glucuronide	SC219699	Santa Cruz Biotechnology	Dallas, TX
Estradiol 3-sulfate 17β-Glucuronide (potassium salt)	18224	Cayman Chemical	Ann Arbor, MI

## Sheet: Table_M2
Type	Orbitrap Parameter	Orbitrap Value
Global	Method Duration	20 min
	Application Mode	Small Molecule
	Ion Source	H-ESI
	Positive Spray Voltage	3500
	Negative Spray Voltage	2500
	Sheath Gas (Arb)	50
	Aux Gas (Arb)	10
	Sweep Gas (Arb)	1
	Ion transfer tube temperature	325C
	Vaporizer Temperature	350C
	Internal Mass Calibration	EASY_IC
	Mode	Scan-to-scan
	Expected peak width	6sec
MS1	Mild trapping	True
	Resolution	100000
	Scan Range (m/z)	100-1000
	Maximum Injection Time Mode	Custom
	Maximum Injection Time (ms)	100
	Microscans	1
	RF lens (%)	70
	AGC Target	Standards
	EASY-IC	On
	DataType	Profile
Filter: Dynamic Excluson	Source Fragmentation	False
	Exclude after n times	1
	Exclusion Duration (s)	6
	Exclusion Mass Width	ppm
	Mass tolerance high	5
	Mass tolerance low	5
Filter: Intensity Threshold	Exclude isotopes	True
Data Dependent MS2	Minimum Intenisty	20000
	# of dependent scans	4
	Resolution	30000
	desired minimum points across the peak	9
	isolation window (m/z)	1.5
	Multiplex Ions Enabled	False
	Isolation Offset	Off
	Maximum Number of multiplexed ions	0
	Reported Mass	Offset Mass
	Collision Energy Type	Normalized
	HCD Collision Energies (%)	20, 35, 50
	Microscans	1
	AGC Target	Standard
	Maximum Injection Time Mode	Dynamic
	DataType	Profile
	Source Fragmentation	False

## Sheet: Table_M3
Type	ZennTOF Parameter	Value
	Workflow	Small molecule
	Method Duration	20 minutes
Source and Gas	Ion Source gas 1	50 psi
	Ion Source gas 2	60 psi
	Curtain gas	35 psi
	CAD gas	9
	Temperature	550C
Experiment	IDA
	Polarity	Negative
	Spray Voltage (V)	-4500
TOF MS	TOF start mass	80 Da
	TOF stop mass	1000 Da
	Accumulation time	0.1 sec
	Declustering potential (V)	-80
	DP spread (V)	0
	Collsion Energy (V)	-10
	CE spread (V)	0
IDA criteria	small molecule
	maximum candate ions	25
	Intensity threshold exceeds	1000cps
	Dynamic background subtraction	True
	Exclude formed candidate ions	False
TOF MSMS	Fragmentation mode	CID
	TOF start mass	40
	TOP stop mass	1000
	Accumulation time	0.01 sec
	Declustering potential (V)	-80
	DP spread (V)	0
	Zeno pulsing	True
	Q1 resolution	Unit
	Collision Energy (V)	-12
	CE spread (V)	0
